# Supplementary material
Source: HighWire-hosted journal article supplement (https://bmjopen.bmj.com/content/12/9/e060839)
Supplement: inline-supplementary-material-2 [file inline-supplementary-material-2.pdf]

**Supplementary File 2.****Detailed analysis of annual incidence trend of colorectal cancer using Joinpoint regression analysis among young patients based on tumor location and tumor side involvement****a. Trend Analysis for CRC Cases Among Young Patients**

## 1. Graph

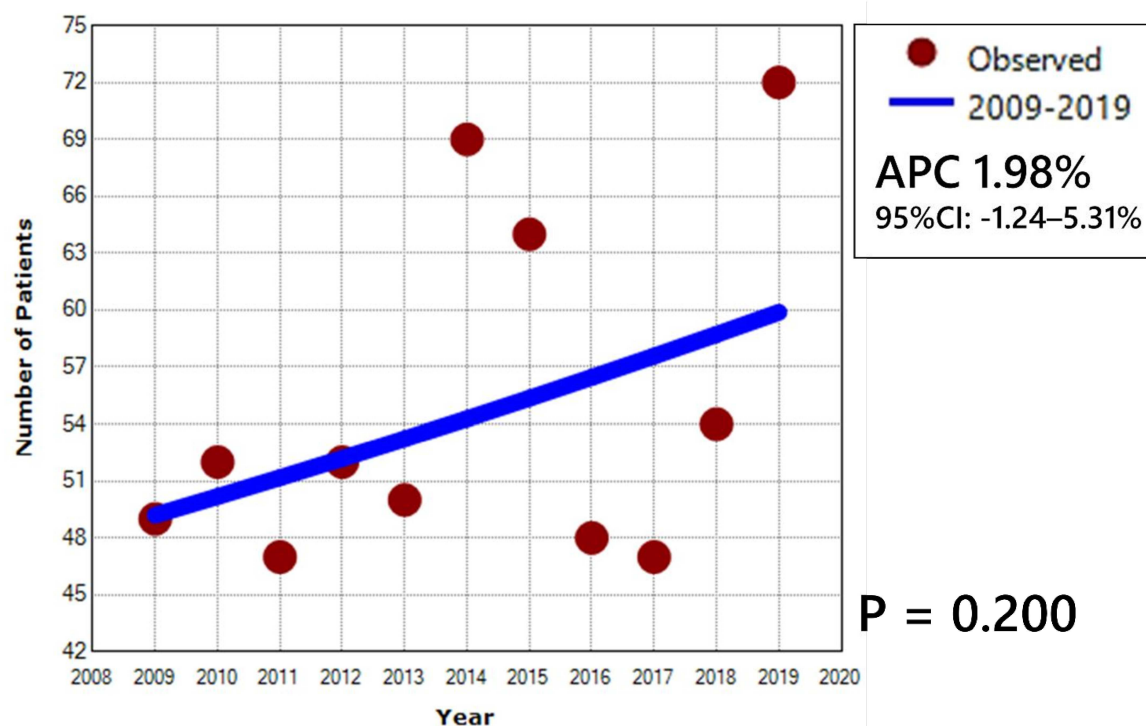

2. The significance test results using the Monte Carlo permutation statistical method to determine the time series's best-fitted line segment(s) to represent substantial trend changes (referred to as APC value) in Joinpoint regression analysis.

| Annual Percent Change (APC)                                                                                                                                                                                                              |                |                |      |          |          |                    |           |
|------------------------------------------------------------------------------------------------------------------------------------------------------------------------------------------------------------------------------------------|----------------|----------------|------|----------|----------|--------------------|-----------|
| Segment                                                                                                                                                                                                                                  | Lower Endpoint | Upper Endpoint | APC  | Lower CI | Upper CI | Test Statistic (t) | Prob >  t |
| 1                                                                                                                                                                                                                                        | 2009.00        | 2019.00        | 1.98 | -1.24    | 5.31     | 1.38               | 0.200     |
| * Indicates that the Annual Percent Change (APC) is significantly different from zero at the alpha = 0.05 level                                                                                                                          |                |                |      |          |          |                    |           |
| Average Annual Percent Change (AAPC)                                                                                                                                                                                                     |                |                |      |          |          |                    |           |
| Range                                                                                                                                                                                                                                    | Lower Endpoint | Upper Endpoint | AAPC | Lower CI | Upper CI | Test Statistic~    | P-Value~  |
| Full Range                                                                                                                                                                                                                               | 2009.00        | 2019.00        | 1.98 | -1.24    | 5.31     | 1.38               | 0.200     |
| * Indicates that the AAPC is significantly different from zero at the alpha = 0.05 level.<br>~ If the AAPC is within one segment, the t-distribution is used. Otherwise, the normal (z) distribution is used. <a href="#">Learn More</a> |                |                |      |          |          |                    |           |

## b. Trend Analysis for Colon Cancer Cases Among Young Patients

### 1. Graph

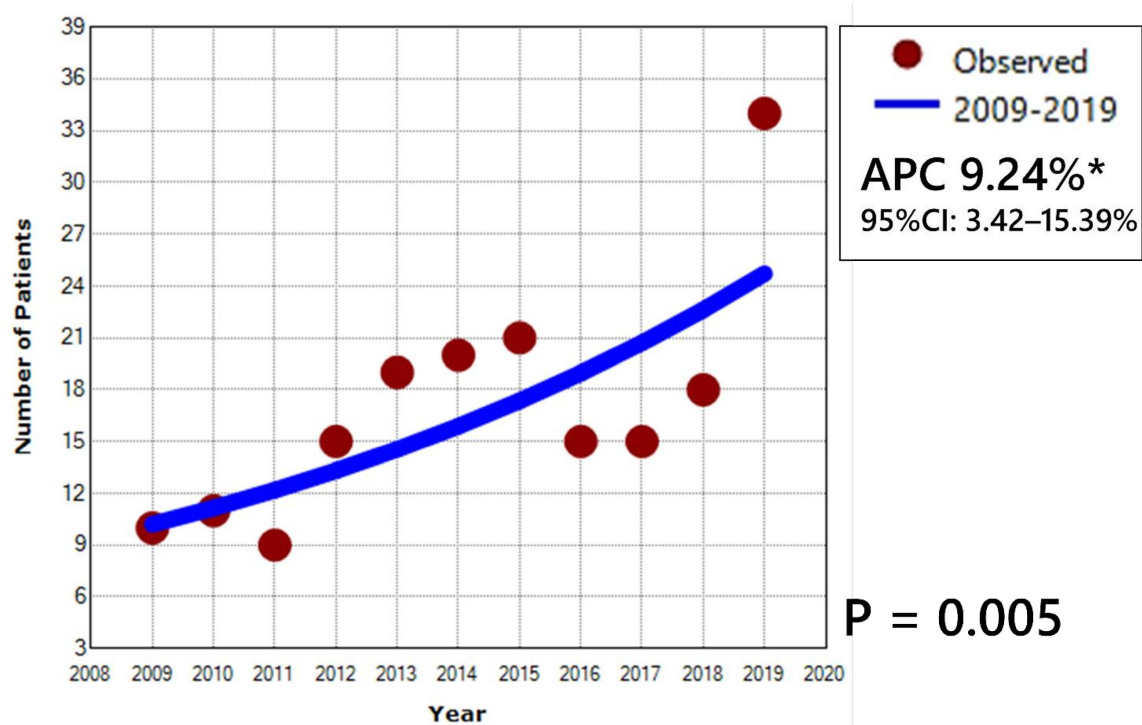

2. The significance test results using the Monte Carlo permutation statistical method to determine the time series's best-fitted line segment(s) to represent substantial trend changes (referred to as APC value) in Joinpoint regression analysis.

| Annual Percent Change (APC)                                                                                                                 |                |                |       |          |          |                    |           |
|---------------------------------------------------------------------------------------------------------------------------------------------|----------------|----------------|-------|----------|----------|--------------------|-----------|
| Segment                                                                                                                                     | Lower Endpoint | Upper Endpoint | APC   | Lower CI | Upper CI | Test Statistic (t) | Prob >  t |
| 1                                                                                                                                           | 2009.00        | 2019.00        | 9.24* | 3.42     | 15.39    | 3.65               | 0.005     |
| * Indicates that the Annual Percent Change (APC) is significantly different from zero at the alpha = 0.05 level                             |                |                |       |          |          |                    |           |
| Average Annual Percent Change (AAPC)                                                                                                        |                |                |       |          |          |                    |           |
| Range                                                                                                                                       | Lower Endpoint | Upper Endpoint | AAPC  | Lower CI | Upper CI | Test Statistic~    | P-Value~  |
| Full Range                                                                                                                                  | 2009.00        | 2019.00        | 9.24* | 3.42     | 15.39    | 3.65               | 0.005     |
| * Indicates that the AAPC is significantly different from zero at the alpha = 0.05 level.                                                   |                |                |       |          |          |                    |           |
| ~ If the AAPC is within one segment, the t-distribution is used. Otherwise, the normal (z) distribution is used. <a href="#">Learn More</a> |                |                |       |          |          |                    |           |

### c. Trend Analysis for Rectal Cancer Cases Among Young Patients

#### 1. Graph

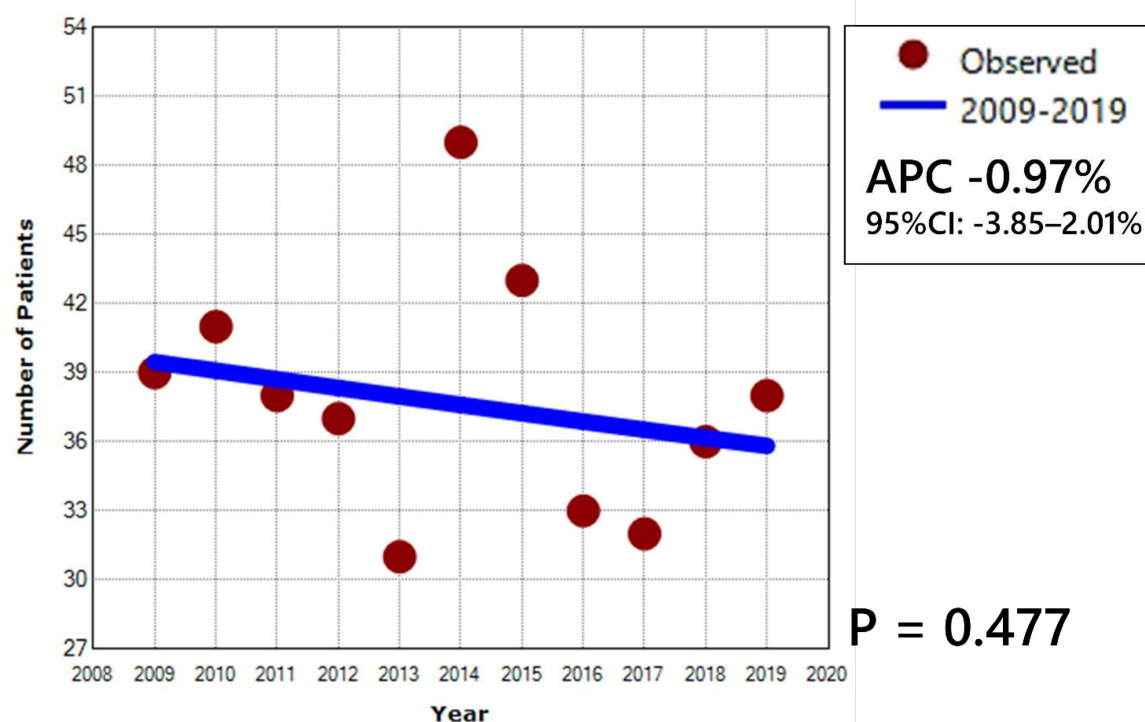

2. The significance test results using the Monte Carlo permutation statistical method to determine the time series's best-fitted line segment(s) to represent substantial trend changes (referred to as APC value) in Joinpoint regression analysis.

| Annual Percent Change (APC)                                                                                                                 |                |                |       |          |          |                    |           |
|---------------------------------------------------------------------------------------------------------------------------------------------|----------------|----------------|-------|----------|----------|--------------------|-----------|
| Segment                                                                                                                                     | Lower Endpoint | Upper Endpoint | APC   | Lower CI | Upper CI | Test Statistic (t) | Prob >  t |
| 1                                                                                                                                           | 2009.00        | 2019.00        | -0.97 | -3.85    | 2.01     | -0.74              | 0.477     |
| * Indicates that the Annual Percent Change (APC) is significantly different from zero at the alpha = 0.05 level                             |                |                |       |          |          |                    |           |
| Average Annual Percent Change (AAPC)                                                                                                        |                |                |       |          |          |                    |           |
| Range                                                                                                                                       | Lower Endpoint | Upper Endpoint | AAPC  | Lower CI | Upper CI | Test Statistic~    | P-Value~  |
| Full Range                                                                                                                                  | 2009.00        | 2019.00        | -0.97 | -3.85    | 2.01     | -0.74              | 0.477     |
| * Indicates that the AAPC is significantly different from zero at the alpha = 0.05 level.                                                   |                |                |       |          |          |                    |           |
| ~ If the AAPC is within one segment, the t-distribution is used. Otherwise, the normal (z) distribution is used. <a href="#">Learn More</a> |                |                |       |          |          |                    |           |

#### d. Trend Analysis for Right-Sided CRC Cases Among Young Patients

##### 1. Graph

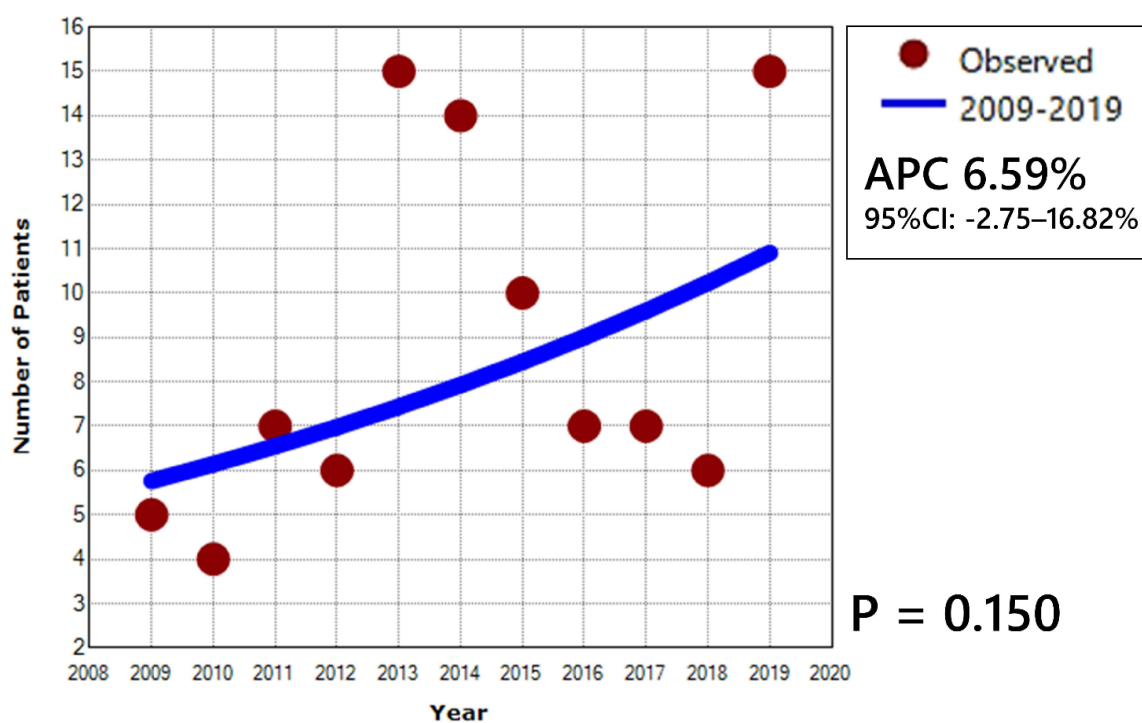

2. The significance test results using the Monte Carlo permutation statistical method to determine the time series's best-fitted line segment(s) to represent substantial trend changes (referred to as APC value) in Joinpoint regression analysis.

| Annual Percent Change (APC)                                                                                                                 |                |                |      |          |          |                    |           |
|---------------------------------------------------------------------------------------------------------------------------------------------|----------------|----------------|------|----------|----------|--------------------|-----------|
| Segment                                                                                                                                     | Lower Endpoint | Upper Endpoint | APC  | Lower CI | Upper CI | Test Statistic (t) | Prob >  t |
| 1                                                                                                                                           | 2009.00        | 2019.00        | 6.59 | -2.75    | 16.82    | 1.57               | 0.150     |
| * Indicates that the Annual Percent Change (APC) is significantly different from zero at the alpha = 0.05 level                             |                |                |      |          |          |                    |           |
| Average Annual Percent Change (AAPC)                                                                                                        |                |                |      |          |          |                    |           |
| Range                                                                                                                                       | Lower Endpoint | Upper Endpoint | AAPC | Lower CI | Upper CI | Test Statistic~    | P-Value~  |
| Full Range                                                                                                                                  | 2009.00        | 2019.00        | 6.59 | -2.75    | 16.82    | 1.57               | 0.150     |
| * Indicates that the AAPC is significantly different from zero at the alpha = 0.05 level.                                                   |                |                |      |          |          |                    |           |
| ~ If the AAPC is within one segment, the t-distribution is used. Otherwise, the normal (z) distribution is used. <a href="#">Learn More</a> |                |                |      |          |          |                    |           |

**e. Trend Analysis for Left-Sided CRC Cases Among Young Patients**

1. Graph

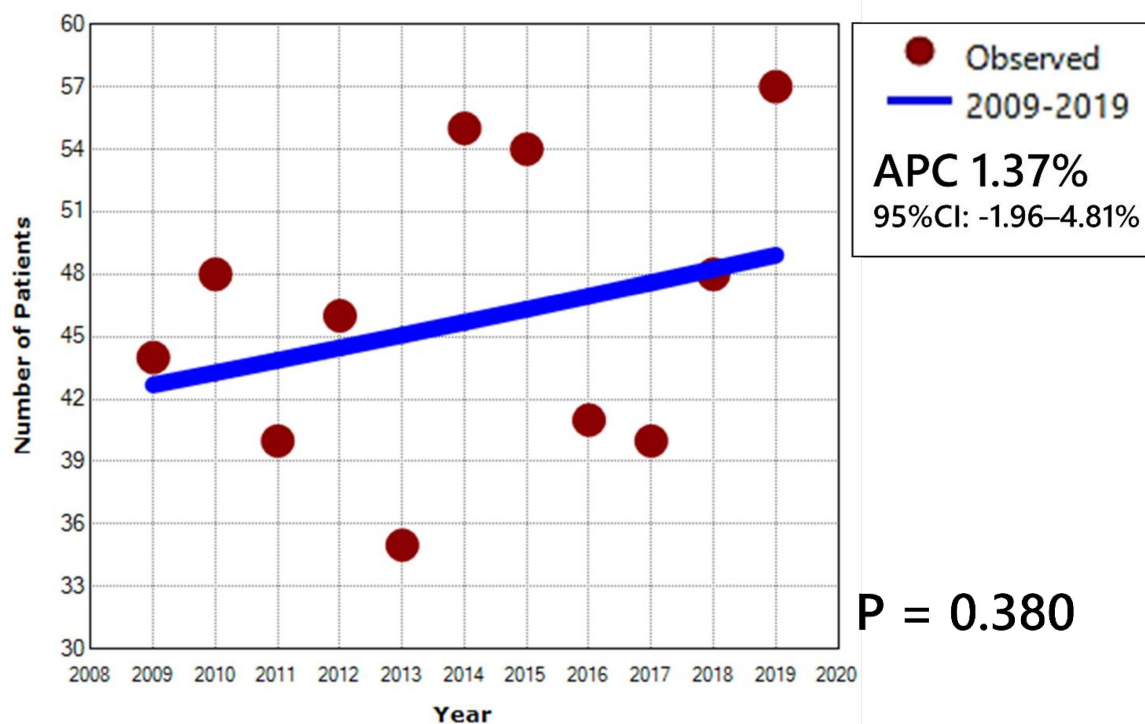

2. The significance test results using the Monte Carlo permutation statistical method to determine the time series's best-fitted line segment(s) to represent substantial trend changes (referred to as APC value) in Joinpoint regression analysis.

| Annual Percent Change (APC)                                                                                                                 |                |                |      |          |          |                    |           |
|---------------------------------------------------------------------------------------------------------------------------------------------|----------------|----------------|------|----------|----------|--------------------|-----------|
| Segment                                                                                                                                     | Lower Endpoint | Upper Endpoint | APC  | Lower CI | Upper CI | Test Statistic (t) | Prob >  t |
| 1                                                                                                                                           | 2009.00        | 2019.00        | 1.37 | -1.96    | 4.81     | 0.92               | 0.380     |
| * Indicates that the Annual Percent Change (APC) is significantly different from zero at the alpha = 0.05 level                             |                |                |      |          |          |                    |           |
| Average Annual Percent Change (AAPC)                                                                                                        |                |                |      |          |          |                    |           |
| Range                                                                                                                                       | Lower Endpoint | Upper Endpoint | AAPC | Lower CI | Upper CI | Test Statistic~    | P-Value~  |
| Full Range                                                                                                                                  | 2009.00        | 2019.00        | 1.37 | -1.96    | 4.81     | 0.92               | 0.380     |
| * Indicates that the AAPC is significantly different from zero at the alpha = 0.05 level.                                                   |                |                |      |          |          |                    |           |
| ~ If the AAPC is within one segment, the t-distribution is used. Otherwise, the normal (z) distribution is used. <a href="#">Learn More</a> |                |                |      |          |          |                    |           |
