# Supplementary material
Source: HighWire-hosted journal article supplement (https://bmjopen.bmj.com/content/12/9/e060839)
Supplement: inline-supplementary-material-3 [file inline-supplementary-material-3.pdf]

**Supplementary File 3.****Detailed analysis of annual incidence trend of colorectal cancer using Joinpoint regression analysis among old patients based on tumor location and tumor side involvement****a. Trend Analysis for CRC Cases Among Old Patients**

## 1. Graph

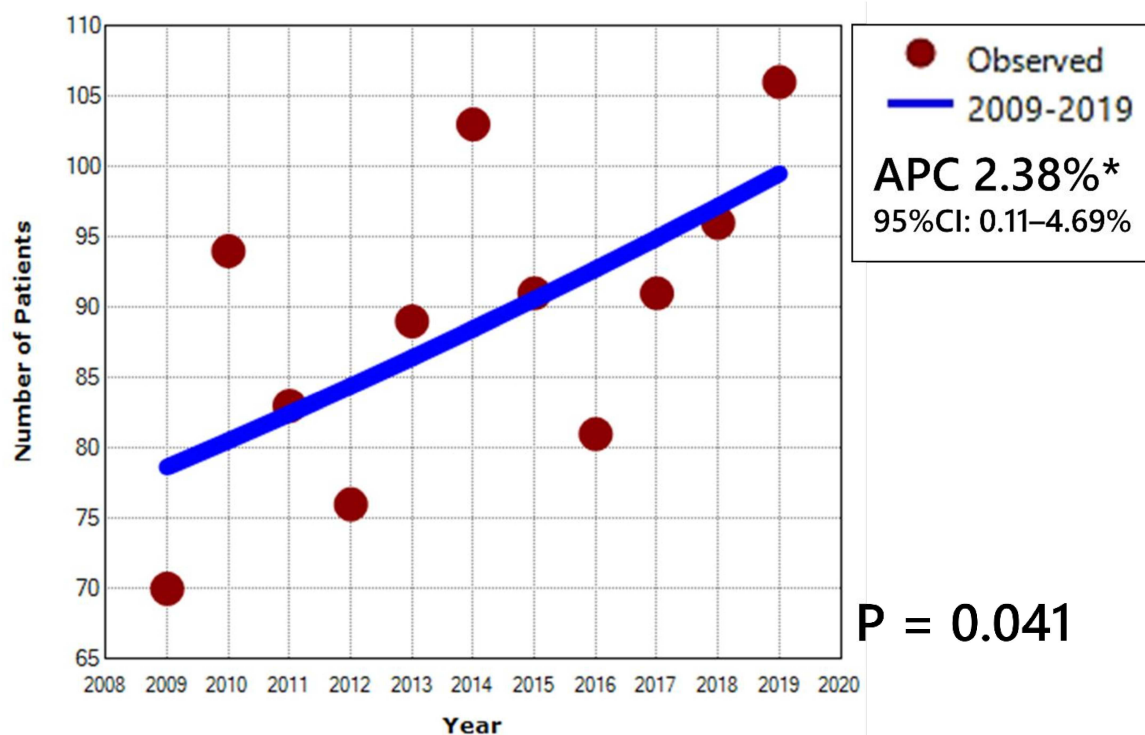

2. The significance test results using the Monte Carlo permutation statistical method to determine the time series's best-fitted line segment(s) to represent substantial trend changes (referred to as APC value) in Joinpoint regression analysis:

| Annual Percent Change (APC)                                                                                                                 |                |                |       |          |          |                    |           |
|---------------------------------------------------------------------------------------------------------------------------------------------|----------------|----------------|-------|----------|----------|--------------------|-----------|
| Segment                                                                                                                                     | Lower Endpoint | Upper Endpoint | APC   | Lower CI | Upper CI | Test Statistic (t) | Prob >  t |
| 1                                                                                                                                           | 2009.00        | 2019.00        | 2.38* | 0.11     | 4.69     | 2.38               | 0.041     |
| * Indicates that the Annual Percent Change (APC) is significantly different from zero at the alpha = 0.05 level                             |                |                |       |          |          |                    |           |
| Average Annual Percent Change (AAPC)                                                                                                        |                |                |       |          |          |                    |           |
| Range                                                                                                                                       | Lower Endpoint | Upper Endpoint | AAPC  | Lower CI | Upper CI | Test Statistic~    | P-Value~  |
| Full Range                                                                                                                                  | 2009.00        | 2019.00        | 2.38* | 0.11     | 4.69     | 2.38               | 0.041     |
| * Indicates that the AAPC is significantly different from zero at the alpha = 0.05 level.                                                   |                |                |       |          |          |                    |           |
| ~ If the AAPC is within one segment, the t-distribution is used. Otherwise, the normal (z) distribution is used. <a href="#">Learn More</a> |                |                |       |          |          |                    |           |

## b. Trend Analysis for Colon Cancer Cases Among Old Patients

### 1. Graph

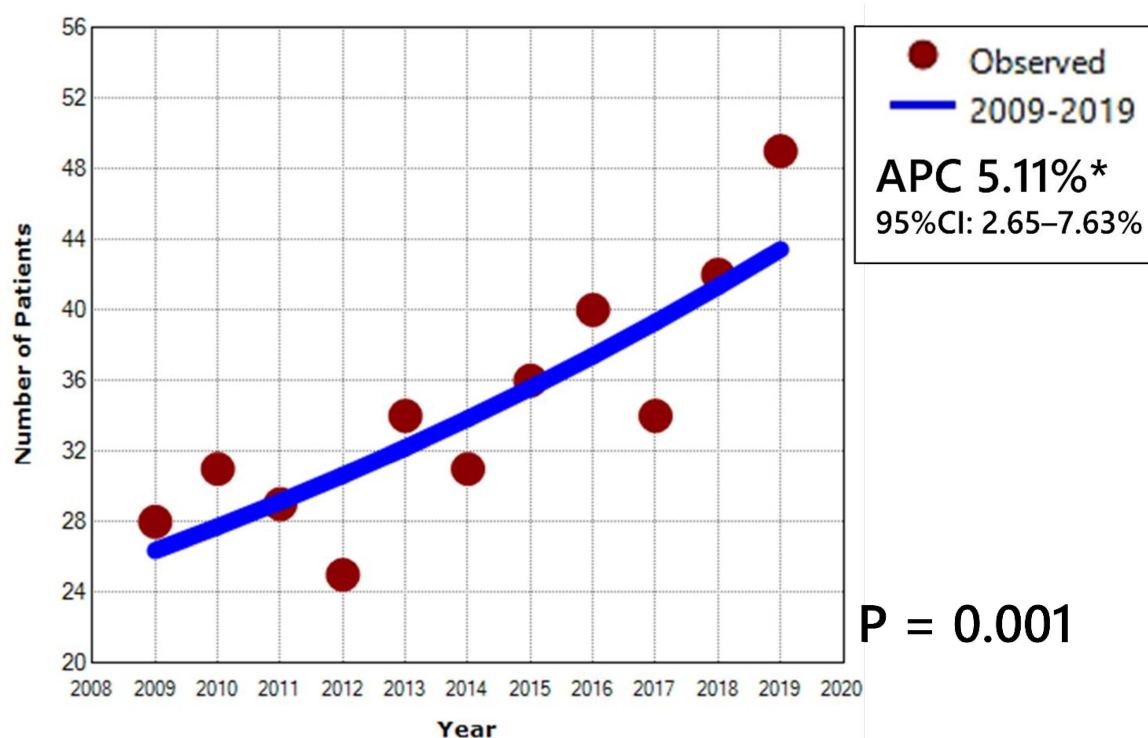

2. The significance test results using the Monte Carlo permutation statistical method to determine the time series's best-fitted line segment(s) to represent substantial trend changes (referred to as APC value) in Joinpoint regression analysis:

| Annual Percent Change (APC)                                                                                                                 |                |                |       |          |          |                    |           |
|---------------------------------------------------------------------------------------------------------------------------------------------|----------------|----------------|-------|----------|----------|--------------------|-----------|
| Segment                                                                                                                                     | Lower Endpoint | Upper Endpoint | APC   | Lower CI | Upper CI | Test Statistic (t) | Prob >  t |
| 1                                                                                                                                           | 2009.00        | 2019.00        | 5.11* | 2.65     | 7.63     | 4.76               | 0.001     |
| * Indicates that the Annual Percent Change (APC) is significantly different from zero at the alpha = 0.05 level                             |                |                |       |          |          |                    |           |
| Average Annual Percent Change (AAPC)                                                                                                        |                |                |       |          |          |                    |           |
| Range                                                                                                                                       | Lower Endpoint | Upper Endpoint | AAPC  | Lower CI | Upper CI | Test Statistic~    | P-Value~  |
| Full Range                                                                                                                                  | 2009.00        | 2019.00        | 5.11* | 2.65     | 7.63     | 4.76               | 0.001     |
| * Indicates that the AAPC is significantly different from zero at the alpha = 0.05 level.                                                   |                |                |       |          |          |                    |           |
| ~ If the AAPC is within one segment, the t-distribution is used. Otherwise, the normal (z) distribution is used. <a href="#">Learn More</a> |                |                |       |          |          |                    |           |

### c. Trend Analysis for Rectal Cancer Cases Among Old Patients

#### 1. Graph

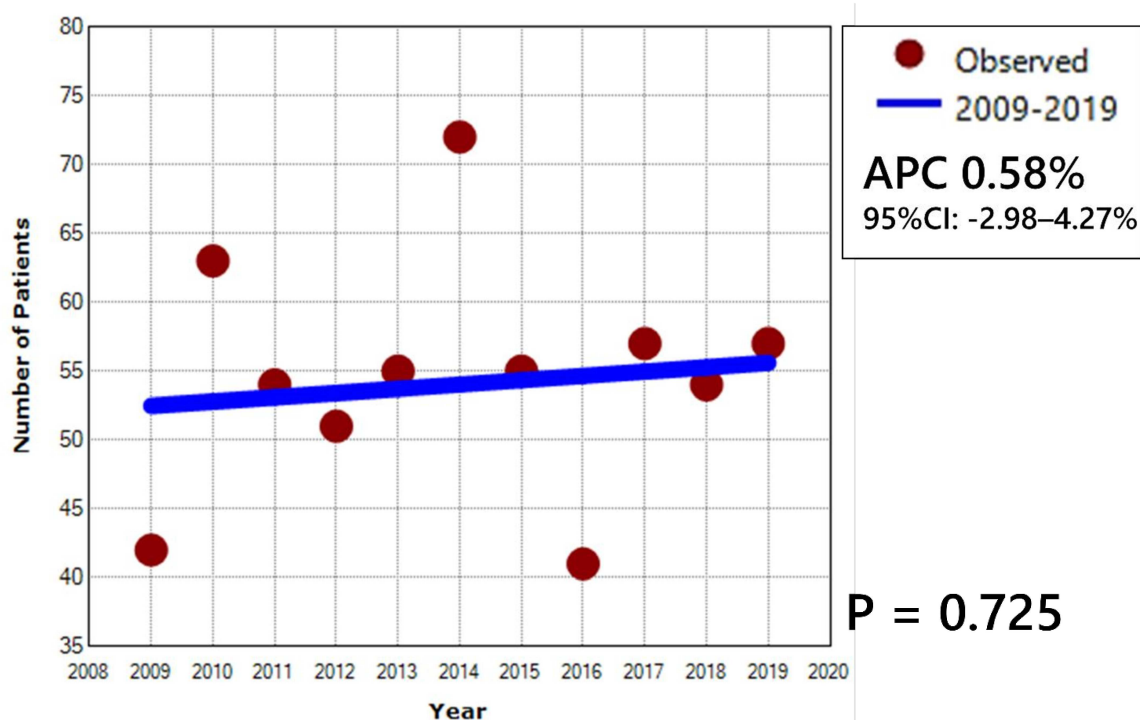

2. The significance test results using the Monte Carlo permutation statistical method to determine the time series's best-fitted line segment(s) to represent substantial trend changes (referred to as APC value) in Joinpoint regression analysis:

| Annual Percent Change (APC)                                                                                                                 |                |                |      |          |          |                    |           |
|---------------------------------------------------------------------------------------------------------------------------------------------|----------------|----------------|------|----------|----------|--------------------|-----------|
| Segment                                                                                                                                     | Lower Endpoint | Upper Endpoint | APC  | Lower CI | Upper CI | Test Statistic (t) | Prob >  t |
| 1                                                                                                                                           | 2009.00        | 2019.00        | 0.58 | -2.98    | 4.27     | 0.36               | 0.725     |
| * Indicates that the Annual Percent Change (APC) is significantly different from zero at the alpha = 0.05 level                             |                |                |      |          |          |                    |           |
| Average Annual Percent Change (AAPC)                                                                                                        |                |                |      |          |          |                    |           |
| Range                                                                                                                                       | Lower Endpoint | Upper Endpoint | AAPC | Lower CI | Upper CI | Test Statistic~    | P-Value~  |
| Full Range                                                                                                                                  | 2009.00        | 2019.00        | 0.58 | -2.98    | 4.27     | 0.36               | 0.725     |
| * Indicates that the AAPC is significantly different from zero at the alpha = 0.05 level.                                                   |                |                |      |          |          |                    |           |
| ~ If the AAPC is within one segment, the t-distribution is used. Otherwise, the normal (z) distribution is used. <a href="#">Learn More</a> |                |                |      |          |          |                    |           |

#### d. Trend Analysis for Right-Sided CRC Cases Among Old Patients

##### 1. Graph

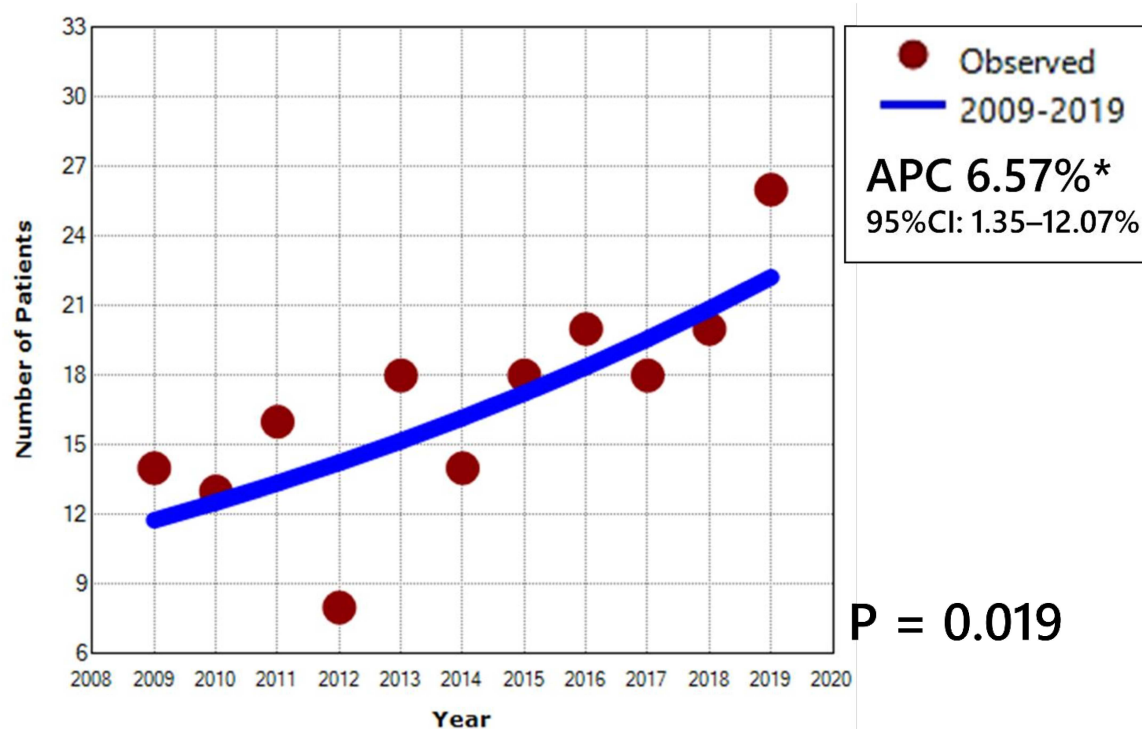

2. The significance test results using the Monte Carlo permutation statistical method to determine the time series's best-fitted line segment(s) to represent substantial trend changes (referred to as APC value) in Joinpoint regression analysis:

| Annual Percent Change (APC)                                                                                                                 |                |                |       |          |          |                    |           |
|---------------------------------------------------------------------------------------------------------------------------------------------|----------------|----------------|-------|----------|----------|--------------------|-----------|
| Segment                                                                                                                                     | Lower Endpoint | Upper Endpoint | APC   | Lower CI | Upper CI | Test Statistic (t) | Prob >  t |
| 1                                                                                                                                           | 2009.00        | 2019.00        | 6.57* | 1.35     | 12.07    | 2.87               | 0.019     |
| * Indicates that the Annual Percent Change (APC) is significantly different from zero at the alpha = 0.05 level                             |                |                |       |          |          |                    |           |
| Average Annual Percent Change (AAPC)                                                                                                        |                |                |       |          |          |                    |           |
| Range                                                                                                                                       | Lower Endpoint | Upper Endpoint | AAPC  | Lower CI | Upper CI | Test Statistic~    | P-Value~  |
| Full Range                                                                                                                                  | 2009.00        | 2019.00        | 6.57* | 1.35     | 12.07    | 2.87               | 0.019     |
| * Indicates that the AAPC is significantly different from zero at the alpha = 0.05 level.                                                   |                |                |       |          |          |                    |           |
| ~ If the AAPC is within one segment, the t-distribution is used. Otherwise, the normal (z) distribution is used. <a href="#">Learn More</a> |                |                |       |          |          |                    |           |

**e. Trend Analysis for Left-Sided CRC Cases Among Old Patients**

1. Graph

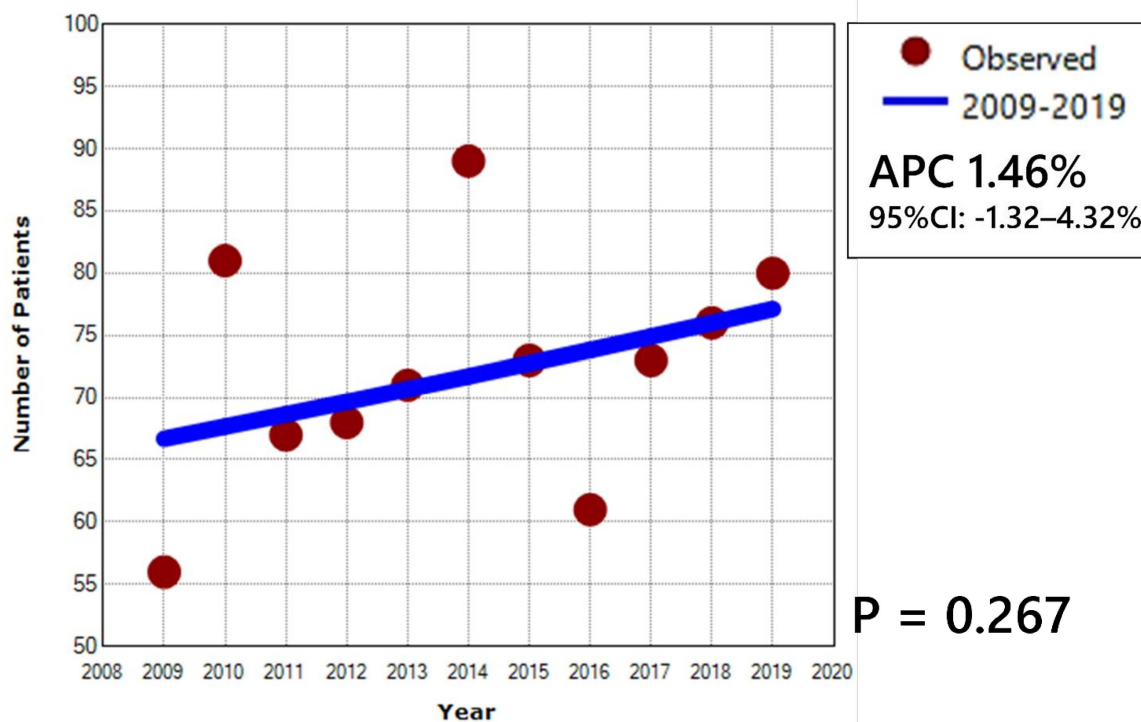

2. The significance test results using the Monte Carlo permutation statistical method to determine the time series's best-fitted line segment(s) to represent substantial trend changes (referred to as APC value) in Joinpoint regression analysis:

| Annual Percent Change (APC)                                                                                                                 |                |                |      |          |          |                    |           |
|---------------------------------------------------------------------------------------------------------------------------------------------|----------------|----------------|------|----------|----------|--------------------|-----------|
| Segment                                                                                                                                     | Lower Endpoint | Upper Endpoint | APC  | Lower CI | Upper CI | Test Statistic (t) | Prob >  t |
| 1                                                                                                                                           | 2009.00        | 2019.00        | 1.46 | -1.32    | 4.32     | 1.18               | 0.267     |
| * Indicates that the Annual Percent Change (APC) is significantly different from zero at the alpha = 0.05 level                             |                |                |      |          |          |                    |           |
| Average Annual Percent Change (AAPC)                                                                                                        |                |                |      |          |          |                    |           |
| Range                                                                                                                                       | Lower Endpoint | Upper Endpoint | AAPC | Lower CI | Upper CI | Test Statistic~    | P-Value~  |
| Full Range                                                                                                                                  | 2009.00        | 2019.00        | 1.46 | -1.32    | 4.32     | 1.18               | 0.267     |
| * Indicates that the AAPC is significantly different from zero at the alpha = 0.05 level.                                                   |                |                |      |          |          |                    |           |
| ~ If the AAPC is within one segment, the t-distribution is used. Otherwise, the normal (z) distribution is used. <a href="#">Learn More</a> |                |                |      |          |          |                    |           |
