# Supplementary material
Source: HighWire-hosted journal article supplement (https://bmjopen.bmj.com/content/12/9/e060839)
Supplement: inline-supplementary-material-4 [file inline-supplementary-material-4.pdf]

## Supplementary File 4.

Detailed analysis for forecasting future ten-year incidence of colorectal cancer using the best-fitted curve model obtained from regression analysis among all patients based on tumor location and tumor side involvement

### a. Regression Model for Total CRC Cases

#### 1. Curve Options

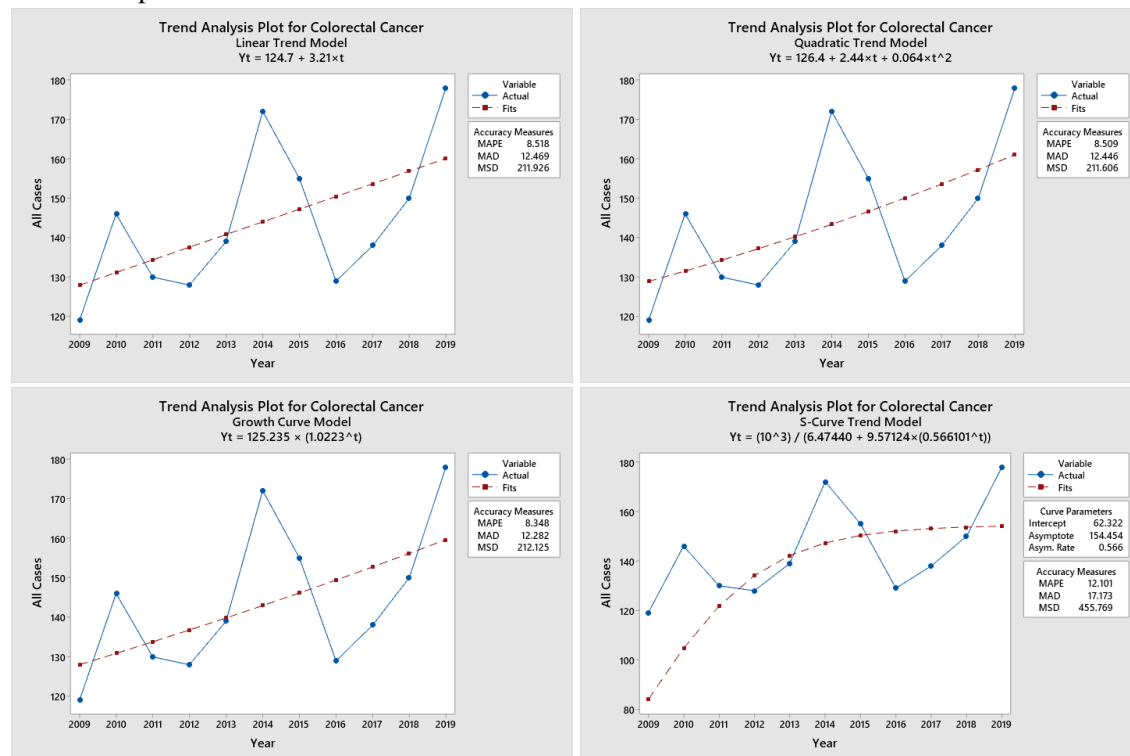

| Model                      | Automatic Fitted-Curve                              | Accuracy Measurements |               |                |
|----------------------------|-----------------------------------------------------|-----------------------|---------------|----------------|
|                            |                                                     | MAPE                  | MAD           | MSD            |
| Linear                     | $Y_t = 124.7 + 3.21t$                               | 8.518                 | 12.469        | 211.926        |
| Quadratic                  | $Y_t = 126.4 + 2.44t + 0.064t^2$                    | 8.509                 | 12.446        | <b>211.606</b> |
| <b>Exponential Growth*</b> | <b><math>Y_t = 125.235 \times (1.0223^t)</math></b> | <b>8.348</b>          | <b>12.282</b> | 212.125        |
| S-shaped                   | $Y_t = 10^3 / (6.4744 + 9.5712 \times (0.5661^t))$  | 12.101                | 17.173        | 455.769        |

\*The best-fitted model is the one that has the lowest value for three parameters (MAPE, MAD, and MSD), or at least for two parameters out of three, or at least having the lowest value for MAPE.

2. The significance test results for the slope of curve estimation (i.e., Exponential growth model) employing the ANOVA statistical test in SPSS.

| ANOVA      |                |    |             |       |      |
|------------|----------------|----|-------------|-------|------|
|            | Sum of Squares | df | Mean Square | F     | Sig. |
| Regression | .053           | 1  | .053        | 4.558 | .062 |
| Residual   | .106           | 9  | .012        |       |      |
| Total      | .159           | 10 |             |       |      |

The independent variable is Year.

3. The forecast of the number of cases in the following ten-year period using the Exponential growth model.

| Year         | Forecasted Cases |
|--------------|------------------|
| 2020         | 163.163          |
| 2021         | 166.800          |
| 2022         | 170.518          |
| 2023         | 174.319          |
| 2024         | 178.205          |
| 2025         | 182.177          |
| 2026         | 186.238          |
| 2027         | 190.389          |
| 2028         | 194.633          |
| 2029         | 198.972          |
| <b>Mean</b>  | <b>180.541</b>   |
| <b>Total</b> | <b>1,805.41</b>  |

**b. Regression Model for Total Colon Cancer Cases**

1. Curve Options

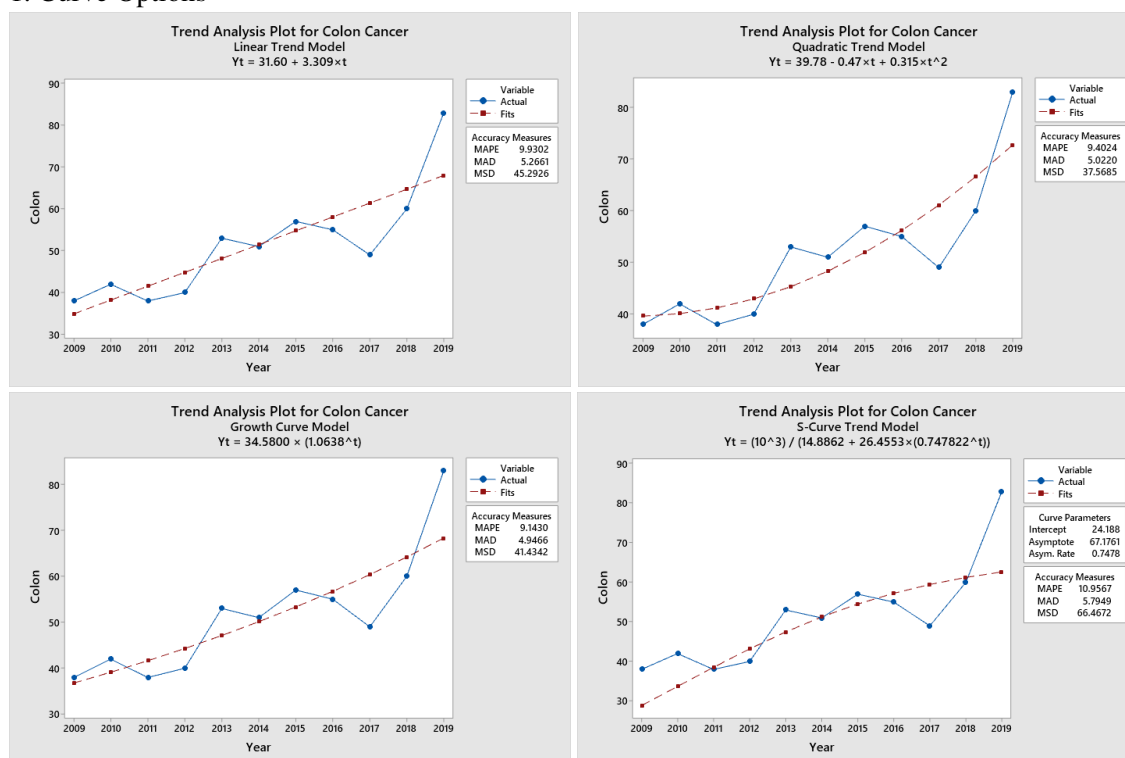

| Model                      | Automatic Fitted-Curve                                 | Accuracy Measurements |               |                |
|----------------------------|--------------------------------------------------------|-----------------------|---------------|----------------|
|                            |                                                        | MAPE                  | MAD           | MSD            |
| Linear                     | $Y_t = 31.60 + 3.309t$                                 | 9.9302                | 5.2661        | 45.2926        |
| Quadratic                  | $Y_t = 39.78 - 0.47t + 0.315t^2$                       | 9.4024                | 5.0220        | <b>37.5685</b> |
| <b>Exponential Growth*</b> | <b><math>Y_t = 34.58 \times (1.0638^t)</math></b>      | <b>9.1430</b>         | <b>4.9466</b> | 41.4342        |
| S-shaped                   | $Y_t = 10^3 / (14.8862 + 26.4553 \times (0.747822^t))$ | 10.9567               | 5.7949        | 66.4672        |

\*The best-fitted model is the one that has the lowest value for three parameters (MAPE, MAD, and MSD), or at least for two parameters out of three, or at least having the lowest value for MAPE.

2. The significance test results for the slope of curve estimation (i.e., Exponential growth model) employing the ANOVA statistical test in SPSS.

| ANOVA      |                |    |             |        |      |
|------------|----------------|----|-------------|--------|------|
|            | Sum of Squares | df | Mean Square | F      | Sig. |
| Regression | .421           | 1  | .421        | 29.084 | .000 |
| Residual   | .130           | 9  | .014        |        |      |
| Total      | .551           | 10 |             |        |      |

The independent variable is Year.

3. The forecast of the number of cases in the following ten-year period using the Exponential growth model.

| Year         | Forecasted Cases |
|--------------|------------------|
| 2020         | 72.652           |
| 2021         | 77.288           |
| 2022         | 82.221           |
| 2023         | 87.468           |
| 2024         | 93.051           |
| 2025         | 98.989           |
| 2026         | 105.307          |
| 2027         | 112.027          |
| 2028         | 119.177          |
| 2029         | 126.783          |
| <b>Mean</b>  | <b>97.4963</b>   |
| <b>Total</b> | <b>974.963</b>   |

### c. Regression Model for Total Rectal Cancer Cases

#### 1. Curve Options

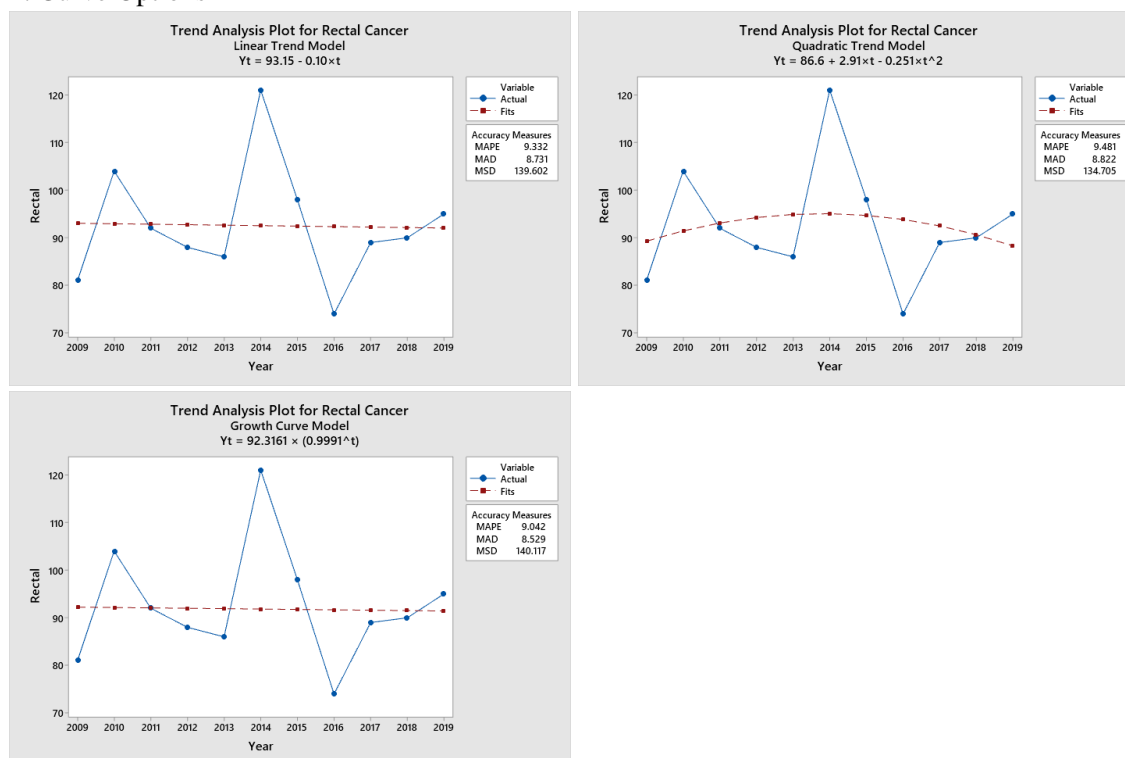

| Model                      | Automatic Fitted-Curve                              | Accuracy Measurements |              |                |
|----------------------------|-----------------------------------------------------|-----------------------|--------------|----------------|
|                            |                                                     | MAPE                  | MAD          | MSD            |
| Linear                     | $Y_t = 93.15 - 0.10t$                               | 9.332                 | 8.731        | 139.602        |
| Quadratic                  | $Y_t = 86.6 + 2.91t + 0.25t^2$                      | 9.481                 | 8.822        | <b>134.705</b> |
| <b>Exponential Growth*</b> | <b><math>Y_t = 92.3161 \times (0.9991^t)</math></b> | <b>9.042</b>          | <b>8.529</b> | 140.117        |
| S-shaped                   | Error: Can not fit the model to these data          | n/a                   | n/a          | n/a            |

\*The best-fitted model is the one that has the lowest value for three parameters (MAPE, MAD, and MSD), or at least for two parameters out of three, or at least having the lowest value for MAPE.

2. The significance test results for the slope of curve estimation (i.e., Exponential growth model) employing the ANOVA statistical test in SPSS.

| ANOVA      |                |    |             |      |      |
|------------|----------------|----|-------------|------|------|
|            | Sum of Squares | df | Mean Square | F    | Sig. |
| Regression | .000           | 1  | .000        | .005 | .948 |
| Residual   | .167           | 9  | .019        |      |      |
| Total      | .167           | 10 |             |      |      |

The independent variable is Year.

3. The forecast of the number of cases in the following ten-year period using the Exponential growth model.

| Year         | Forecasted Cases |
|--------------|------------------|
| 2020         | 91.3487          |
| 2021         | 91.2685          |
| 2022         | 91.1884          |
| 2023         | 91.1084          |
| 2024         | 91.0284          |
| 2025         | 90.9486          |
| 2026         | 90.8688          |
| 2027         | 90.7890          |
| 2028         | 90.7094          |
| 2029         | 90.6298          |
| <b>Mean</b>  | <b>90.9888</b>   |
| <b>Total</b> | <b>909.888</b>   |

#### d. Regression Model for Total Right-Sided CRC Cases

##### 1. Curve Options

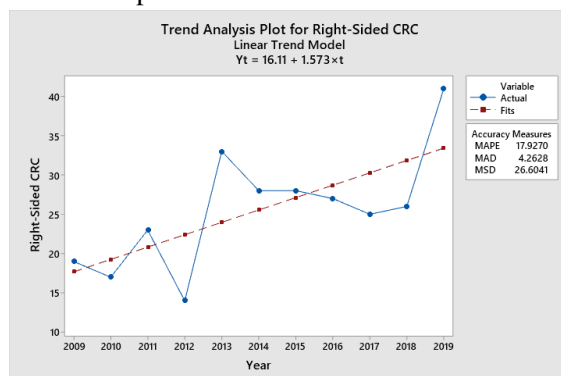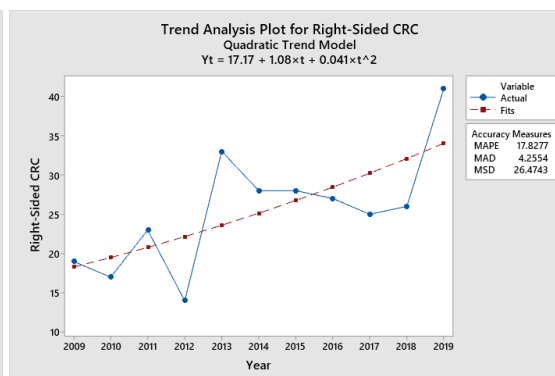

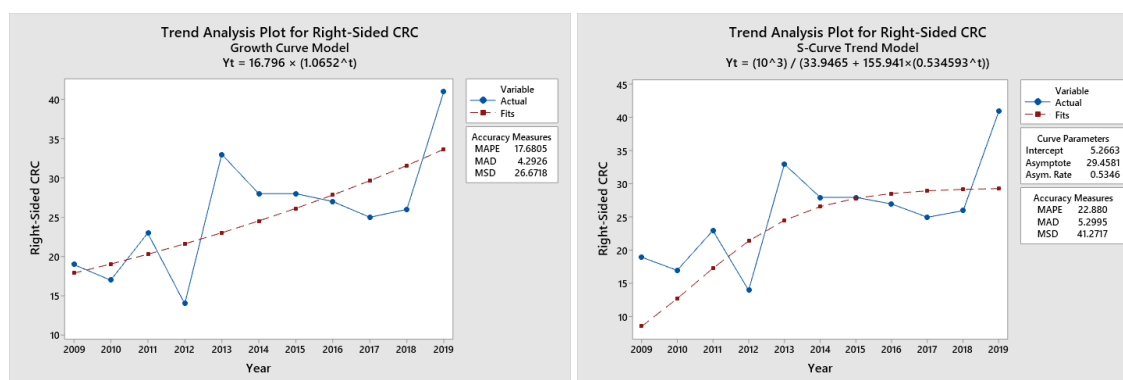

| Model              | Automatic Fitted-Curve                                 | Accuracy Measurements |               |                |
|--------------------|--------------------------------------------------------|-----------------------|---------------|----------------|
|                    |                                                        | MAPE                  | MAD           | MSD            |
| Linear             | $Y_t = 16.11 + 1.573t$                                 | 17.927                | 4.2628        | 26.6041        |
| <b>Quadratic*</b>  | <b><math>Y_t = 17.17 + 1.08t + 0.041t^2</math></b>     | 17.8277               | <b>4.2554</b> | <b>26.4743</b> |
| Exponential Growth | $Y_t = 16.796 \times (1.0652^t)$                       | <b>17.6805</b>        | 4.2926        | 26.6718        |
| S-shaped           | $Y_t = 10^3 / (33.9465 + 155.941 \times (0.534593^t))$ | 22.8801               | 5.2995        | 41.2717        |

\*The best-fitted model is the one that has the lowest value for three parameters (MAPE, MAD, and MSD), or at least for two parameters out of three, or at least having the lowest value for MAPE.

2. The significance test results for the slope of curve estimation (i.e., Quadratic model) employing the ANOVA statistical test in SPSS.

| ANOVA      |                |    |             |       |             |
|------------|----------------|----|-------------|-------|-------------|
|            | Sum of Squares | df | Mean Square | F     | Sig.        |
| Regression | 272.109        | 1  | 272.109     | 8.369 | <b>.018</b> |
| Residual   | 292.618        | 9  | 32.513      |       |             |
| Total      | 564.727        | 10 |             |       |             |

The independent variable is Year.

3. The forecast of the number of cases in the following ten-year period using the Quadratic model.

| Year         | Forecasted Cases |
|--------------|------------------|
| 2020         | 36.0424          |
| 2021         | 38.1455          |
| 2022         | 40.3301          |
| 2023         | 42.5963          |
| 2024         | 44.9441          |
| 2025         | 47.3734          |
| 2026         | 49.8844          |
| 2027         | 52.4769          |
| 2028         | 55.1510          |
| 2029         | 57.9068          |
| <b>Mean</b>  | <b>46.48509</b>  |
| <b>Total</b> | <b>464.8509</b>  |

## e. Regression Model for Total Left-Sided CRC Cases

### 1. Curve Options

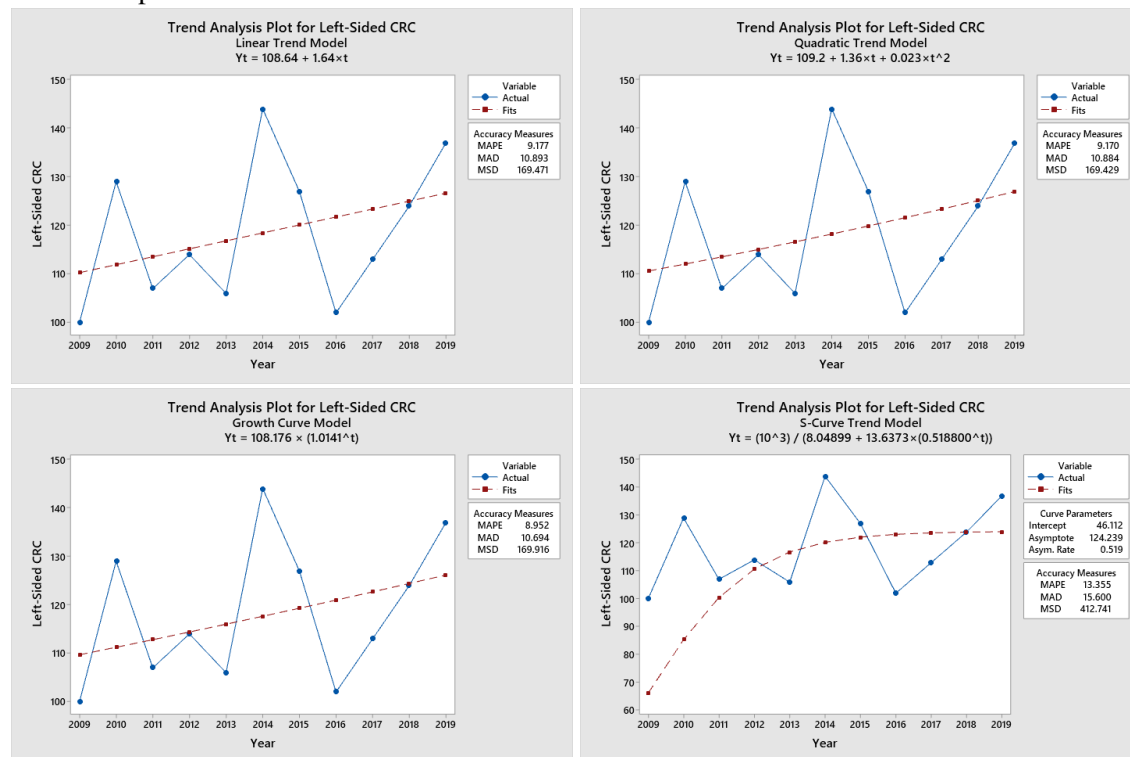

| Model                      | Automatic Fitted-Curve                                 | Accuracy Measurements |               |                |
|----------------------------|--------------------------------------------------------|-----------------------|---------------|----------------|
|                            |                                                        | MAPE                  | MAD           | MSD            |
| Linear                     | $Y_t = 108.64 + 1.64t$                                 | 9.177                 | 10.893        | 169.471        |
| Quadratic                  | $Y_t = 109.2 + 1.36t + 0.023t^2$                       | 9.170                 | 10.884        | <b>169.429</b> |
| <b>Exponential Growth*</b> | <b><math>Y_t = 108.176 \times (1.0141^t)</math></b>    | <b>8.952</b>          | <b>10.694</b> | 169.916        |
| S-shaped                   | $Y_t = 10^3 / (8.04899 + 13.6373 \times (0.518800^t))$ | 13.355                | 15.600        | 412.741        |

\*The best-fitted model is the one that has the lowest value for three parameters (MAPE, MAD, and MSD), or at least for two parameters out of three, or at least having the lowest value for MAPE.

2. The significance test results for the slope of curve estimation (i.e., Exponential growth model) employing the ANOVA statistical test in SPSS.

| ANOVA      |                |    |             |       |      |
|------------|----------------|----|-------------|-------|------|
|            | Sum of Squares | df | Mean Square | F     | Sig. |
| Regression | .022           | 1  | .022        | 1.501 | .252 |
| Residual   | .129           | 9  | .014        |       |      |
| Total      | .150           | 10 |             |       |      |

The independent variable is Year.

3. The forecast of the number of cases in the following ten-year period using the Exponential growth model.

| <b>Year</b>  | <b>Forecasted Cases</b> |
|--------------|-------------------------|
| 2020         | 127.936                 |
| 2021         | 129.737                 |
| 2022         | 131.564                 |
| 2023         | 133.416                 |
| 2024         | 135.294                 |
| 2025         | 137.199                 |
| 2026         | 139.131                 |
| 2027         | 141.090                 |
| 2028         | 143.076                 |
| 2029         | 145.090                 |
| <b>Mean</b>  | <b>136.3533</b>         |
| <b>Total</b> | <b>1363.533</b>         |
