# Supplementary material
Source: HighWire-hosted journal article supplement (https://bmjopen.bmj.com/content/12/9/e060839)
Supplement: inline-supplementary-material-7 [file inline-supplementary-material-7.pdf]

## Supplementary File 7.

The summary of best-fitted models, equations of the predicted case, and several forecasted scenarios between 2020 and 2029.

|                         | Young Patients (<50 years old)    |                                 |                                 |                                 |                                  | Old Patients (≥50 years old)    |                                  |                        |                                  |                                                        | All Patients                      |                                 |                                   |                                  |                                   |
|-------------------------|-----------------------------------|---------------------------------|---------------------------------|---------------------------------|----------------------------------|---------------------------------|----------------------------------|------------------------|----------------------------------|--------------------------------------------------------|-----------------------------------|---------------------------------|-----------------------------------|----------------------------------|-----------------------------------|
|                         | Tumor Locations                   |                                 |                                 | Side Involvement                |                                  | Tumor Locations                 |                                  |                        | Side Involvement                 |                                                        | Tumor Locations                   |                                 |                                   | Side Involvement                 |                                   |
|                         | CRC                               | Colon                           | Rectum                          | Right-sided CRC                 | Left-sided CRC                   | CRC                             | Colon                            | Rectum                 | Right-sided CRC                  | Left-sided CRC                                         | CRC                               | Colon                           | Rectum                            | Right-sided CRC                  | Left-sided CRC                    |
| Best-Fitted Model       | Exponential Growth                | Exponential Growth              | Exponential Growth              | Quadratic                       | Quadratic                        | Quadratic                       | Quadratic                        | Linear                 | Quadratic                        | S-shaped                                               | Exponential Growth                | Exponential Growth              | Exponential Growth                | Quadratic                        | Exponential Growth                |
| Predicted Case Equation | $Y_t = 48.2453 \times (1.0198^t)$ | $Y_t = 9.351 \times (1.0924^t)$ | $Y_t = 39.85 \times (0.9903^t)$ | $Y_t = 2.79 + 1.86t - 0.113t^2$ | $Y_t = 46.33 - 1.26t + 0.161t^2$ | $Y_t = 77.3 + 1.84t + 0.016t^2$ | $Y_t = 29.82 - 1.02t + 0.233t^2$ | $Y_t = 53.11 + 0.255t$ | $Y_t = 14.38 - 0.77t + 0.154t^2$ | $Y_t = 10^3 / (10.0061 + (5.88632 \times 0.938146^t))$ | $Y_t = 125.235 \times (1.0223^t)$ | $Y_t = 34.58 \times (1.0638^t)$ | $Y_t = 92.3161 \times (0.9991^t)$ | $Y_t = 17.17 + 1.08t + 0.041t^2$ | $Y_t = 108.176 \times (1.0141^t)$ |
| MAPE                    | 10.9230                           | 20.8294                         | 9.3215                          | 34.2056                         | 11.9922                          | 7.4248                          | 7.2590                           | 10.5491                | 15.1707                          | 7.6702                                                 | 8.348                             | 9.1430                          | 9.042                             | 17.8277                          | 8.952                             |
| MAD                     | 6.2589                            | 3.7308                          | 3.5723                          | 2.8790                          | 5.4062                           | 6.4832                          | 2.40093                          | 5.5074                 | 2.0717                           | 5.5748                                                 | 12.282                            | 4.9466                          | 8.529                             | 4.2554                           | 10.694                            |
| MSD                     | 61.3589                           | 19.9062                         | 23.4688                         | 11.7923                         | 38.5144                          | 67.3214                         | 8.26099                          | 66.8562                | 6.4315                           | 71.8833                                                | 212.125                           | 41.4342                         | 140.117                           | 26.4743                          | 169.916                           |
| p-value of slope        | 0.200                             | 0.005                           | 0.477                           | 0.217                           | 0.342                            | 0.043                           | 0.001                            | 0.774                  | 0.006                            | 0.267                                                  | 0.062                             | <0.001                          | 0.948                             | 0.018                            | 0.252                             |
| 2020                    | 61.08                             | 27.00                           | 35.47                           | 8.79                            | 54.40                            | 101.73                          | 51.21                            | 56.16                  | 27.25                            | 78.48                                                  | 163.16                            | 72.65                           | 91.35                             | 36.04                            | 127.94                            |
| 2021                    | 62.29                             | 29.50                           | 35.13                           | 7.82                            | 57.16                            | 103.98                          | 56.02                            | 56.42                  | 30.33                            | 79.54                                                  | 166.80                            | 77.29                           | 91.27                             | 38.15                            | 129.74                            |
| 2022                    | 63.53                             | 32.23                           | 34.79                           | 6.62                            | 60.25                            | 106.26                          | 61.30                            | 56.67                  | 33.71                            | 80.55                                                  | 170.52                            | 82.22                           | 91.19                             | 40.33                            | 131.56                            |
| 2023                    | 64.79                             | 35.20                           | 34.45                           | 5.20                            | 63.66                            | 108.58                          | 67.04                            | 56.93                  | 37.40                            | 81.53                                                  | 174.32                            | 87.47                           | 91.11                             | 42.60                            | 133.42                            |
| 2024                    | 66.07                             | 38.46                           | 34.12                           | 3.55                            | 67.38                            | 110.92                          | 73.25                            | 57.18                  | 41.39                            | 82.47                                                  | 178.21                            | 93.05                           | 91.03                             | 44.94                            | 135.29                            |
| 2025                    | 67.38                             | 42.01                           | 33.79                           | 1.68                            | 71.44                            | 113.30                          | 79.93                            | 57.44                  | 45.70                            | 83.37                                                  | 182.18                            | 98.99                           | 90.95                             | 47.37                            | 137.20                            |
| 2026                    | 68.72                             | 45.89                           | 33.46                           | -0.42                           | 75.81                            | 115.71                          | 87.07                            | 57.69                  | 50.31                            | 84.24                                                  | 186.24                            | 105.31                          | 90.87                             | 49.88                            | 139.13                            |
| 2027                    | 70.09                             | 50.13                           | 33.14                           | -2.75                           | 80.50                            | 118.16                          | 94.68                            | 57.95                  | 55.23                            | 85.06                                                  | 190.39                            | 112.03                          | 90.79                             | 52.48                            | 141.09                            |
| 2028                    | 71.48                             | 54.76                           | 32.82                           | -5.30                           | 85.52                            | 120.64                          | 102.76                           | 58.20                  | 60.45                            | 85.85                                                  | 194.63                            | 119.18                          | 90.71                             | 55.15                            | 143.08                            |
| 2029                    | 72.90                             | 59.82                           | 32.50                           | -8.08                           | 90.85                            | 123.15                          | 111.30                           | 58.45                  | 65.99                            | 86.61                                                  | 198.97                            | 126.78                          | 90.63                             | 57.91                            | 145.09                            |
| Total ten years         | 66.83                             | 41.50                           | 33.97                           | 1.71                            | 70.70                            | 112.24                          | 78.46                            | 57.31                  | 44.77                            | 82.77                                                  | 180.54                            | 97.50                           | 90.99                             | 46.49                            | 136.35                            |
| Mean per year           | 668.32                            | 415.01                          | 339.68                          | 17.11                           | 706.97                           | 1122.43                         | 784.55                           | 573.09                 | 447.74                           | 827.71                                                 | 1805.41                           | 974.96                          | 909.89                            | 464.85                           | 1363.53                           |

## Notes:

- $Y_t$  is the variable (equation for predicted cases), and  $t$  is the time unit (year) value.
- The best-fitted model and the most precise predicted case equation were decided from the one model that had the lowest accuracy value for the three measured parameters (i.e., MAPE, MAD, and MSD) or at least having two lowest parameters out of the three, or at least having the lowest value for MAPE if the two former conditions were not met.
- P-value was obtained from the ANOVA test for curve estimation

## Abbreviation:

CRC, colorectal cancer; MAPE, mean absolute percent error; MAD, mean absolute deviation; MSD, mean square deviation.
